# Supplementary material for: Effect of Zn doping on phase transition and electronic structures of Heusler-type Pd2Cr-based alloys: from normal to all-d-metal Heusler
Source: Royal Society of Chemistry journal article supplement (doi:10.1039/d0ra02951c), 2020-01-01
Supplement: d0ra02951c1.pdf [file d0ra02951c1.pdf]

Table S1. Total and atomic magnetic moments for cubic L2<sub>1</sub> Pd<sub>2</sub>CrZ (Z = Al, Ga, In, Tl, Si, Sn, P, As, Sb, Bi, Se, Te, Zn).

| Compounds<br>X <sub>2</sub> YZ | Mt<br>(μ <sub>B</sub> /f.u.) | MCr<br>(μ <sub>B</sub> ) | MZ<br>(μ <sub>B</sub> ) | MPd-1<br>(μ <sub>B</sub> ) | MPd-2<br>(μ <sub>B</sub> ) |
|--------------------------------|------------------------------|--------------------------|-------------------------|----------------------------|----------------------------|
| Pd <sub>2</sub> CrAl           | 3.50                         | 3.25                     | -0.02                   | 0.13                       | 0.13                       |
| Pd <sub>2</sub> CrGa           | 3.53                         | 3.30                     | -0.04                   | 0.13                       | 0.13                       |
| Pd <sub>2</sub> CrIn           | 3.69                         | 3.46                     | -0.04                   | 0.10                       | 0.10                       |
| Pd <sub>2</sub> CrTl           | 3.66                         | 3.51                     | -0.03                   | 0.09                       | 0.09                       |
| Pd <sub>2</sub> CrSi           | 3.33                         | 3.22                     | -0.04                   | 0.07                       | 0.07                       |
| Pd <sub>2</sub> CrSn           | 3.55                         | 3.48                     | -0.06                   | 0.06                       | 0.06                       |
| Pd <sub>2</sub> CrP            | 3.22                         | 3.27                     | -0.57                   | 0.003                      | 0.003                      |
| Pd <sub>2</sub> CrAs           | 3.40                         | 3.41                     | -0.46                   | 0.018                      | 0.018                      |
| Pd <sub>2</sub> CrSb           | 3.56                         | 3.55                     | -0.04                   | 0.02                       | 0.02                       |
| Pd <sub>2</sub> CrBi           | 3.74                         | 3.69                     | -0.04                   | 0.04                       | 0.04                       |
| Pd <sub>2</sub> CrSe           | 3.56                         | 3.58                     | -0.06                   | 0.02                       | 0.02                       |
| Pd <sub>2</sub> CrTe           | 3.71                         | 3.70                     | -0.05                   | 0.02                       | 0.02                       |
| Pd <sub>2</sub> CrZn           | 3.79                         | 3.38                     | -0.001                  | 0.20                       | 0.203.61                   |

Table S2. Total and atomic magnetic moments, and c/a ratio for tetragonal  $L1_0Pd_2CrZ$  ( $Z = Al, Ga, In, Tl, Si, Sn, P, As, Sb, Bi, Se, Te, Zn$ ).

| <b>Compounds<br/><math>X_2YZ</math></b> | <b>Mt<br/>(<math>\mu_B/f.u.</math>)</b> | <b>MCr<br/>(<math>\mu_B</math>)</b> | <b>MZ<br/>(<math>\mu_B</math>)</b> | <b>MPd-1 (<math>\mu_B</math>)</b> | <b>MPd-2 (<math>\mu_B</math>)</b> | <b>c/a</b> |
|-----------------------------------------|-----------------------------------------|-------------------------------------|------------------------------------|-----------------------------------|-----------------------------------|------------|
| Pd <sub>2</sub> CrAl                    | 3.55                                    | 3.23                                | -0.02                              | 0.17                              | 0.17                              | 1.21       |
| Pd <sub>2</sub> CrGa                    | 3.52                                    | 3.27                                | -0.03                              | 0.15                              | 0.15                              | 1.26       |
| Pd <sub>2</sub> CrIn                    | 3.82                                    | 3.53                                | -0.01                              | 0.15                              | 0.15                              | 1.22       |
| Pd <sub>2</sub> CrTl                    | 3.75                                    | 3.50                                | -0.01                              | 0.13                              | 0.13                              | 1.28       |
| Pd <sub>2</sub> CrSi                    | 3.16                                    | 3.09                                | -0.06                              | 0.06                              | 0.06                              | 1.21       |
| Pd <sub>2</sub> CrSn                    | –                                       | –                                   | –                                  | –                                 | –                                 | –          |
| Pd <sub>2</sub> CrP                     | 3.02                                    | 3.10                                | 0.01                               | -0.11                             | -0.11                             | 1.43       |
| Pd <sub>2</sub> CrAs                    | 3.14                                    | 3.21                                | -0.1                               | 0.02                              | 0.02                              | 1.43       |
| Pd <sub>2</sub> CrSb                    | 3.41                                    | 3.46                                | -0.075                             | 0.009                             | 0.009                             | 1.18       |
| Pd <sub>2</sub> CrBi                    | –                                       | –                                   | –                                  | –                                 | –                                 | –          |
| Pd <sub>2</sub> CrSe                    | 3.42                                    | 3.47                                | -0.104                             | 0.02                              | 0.02                              | 1.45       |
| Pd <sub>2</sub> CrTe                    | 3.67                                    | 3.62                                | -0.06                              | 0.05                              | 0.05                              | 1.35       |
| Pd <sub>2</sub> CrZn                    | 3.49                                    | 3.24                                | -0.009                             | 0.12                              | 0.12                              | 1.22       |

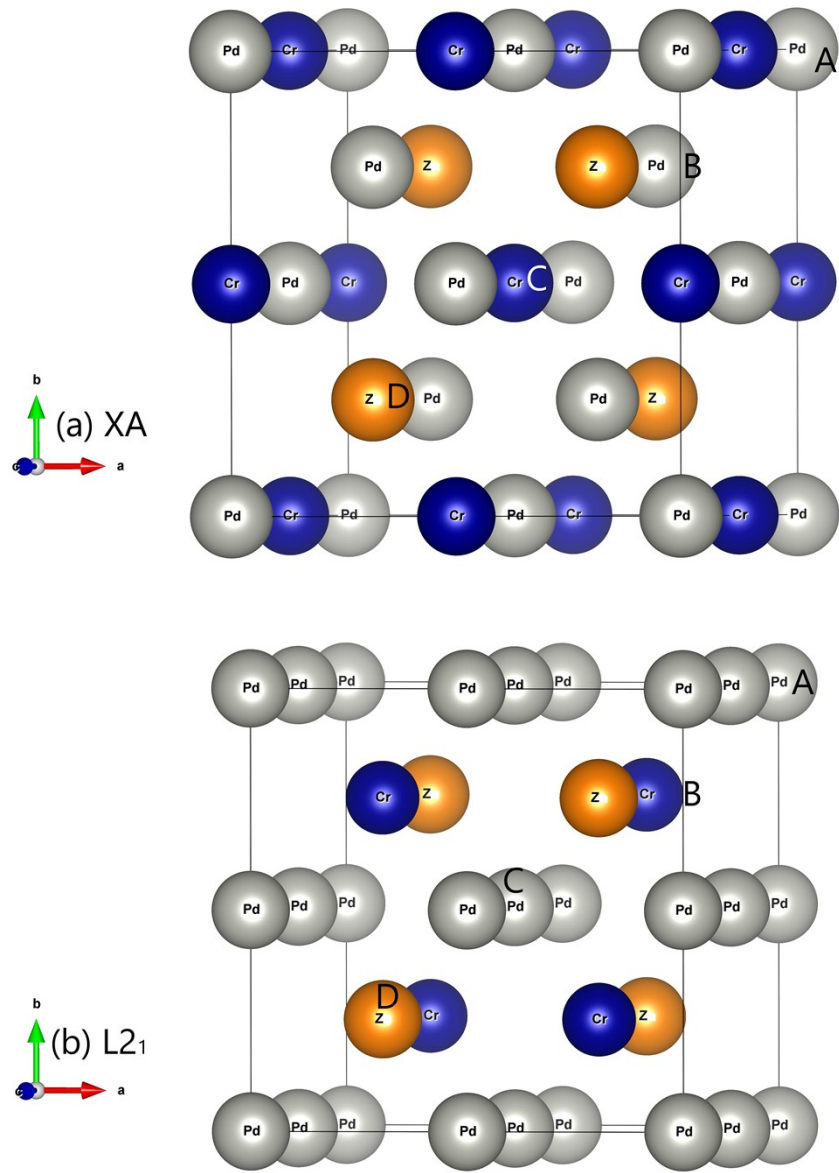

Fig. S1. Crystal structures of XA (a) and L2<sub>1</sub> (b)-type Heusler alloys Pd<sub>2</sub>CrZ.

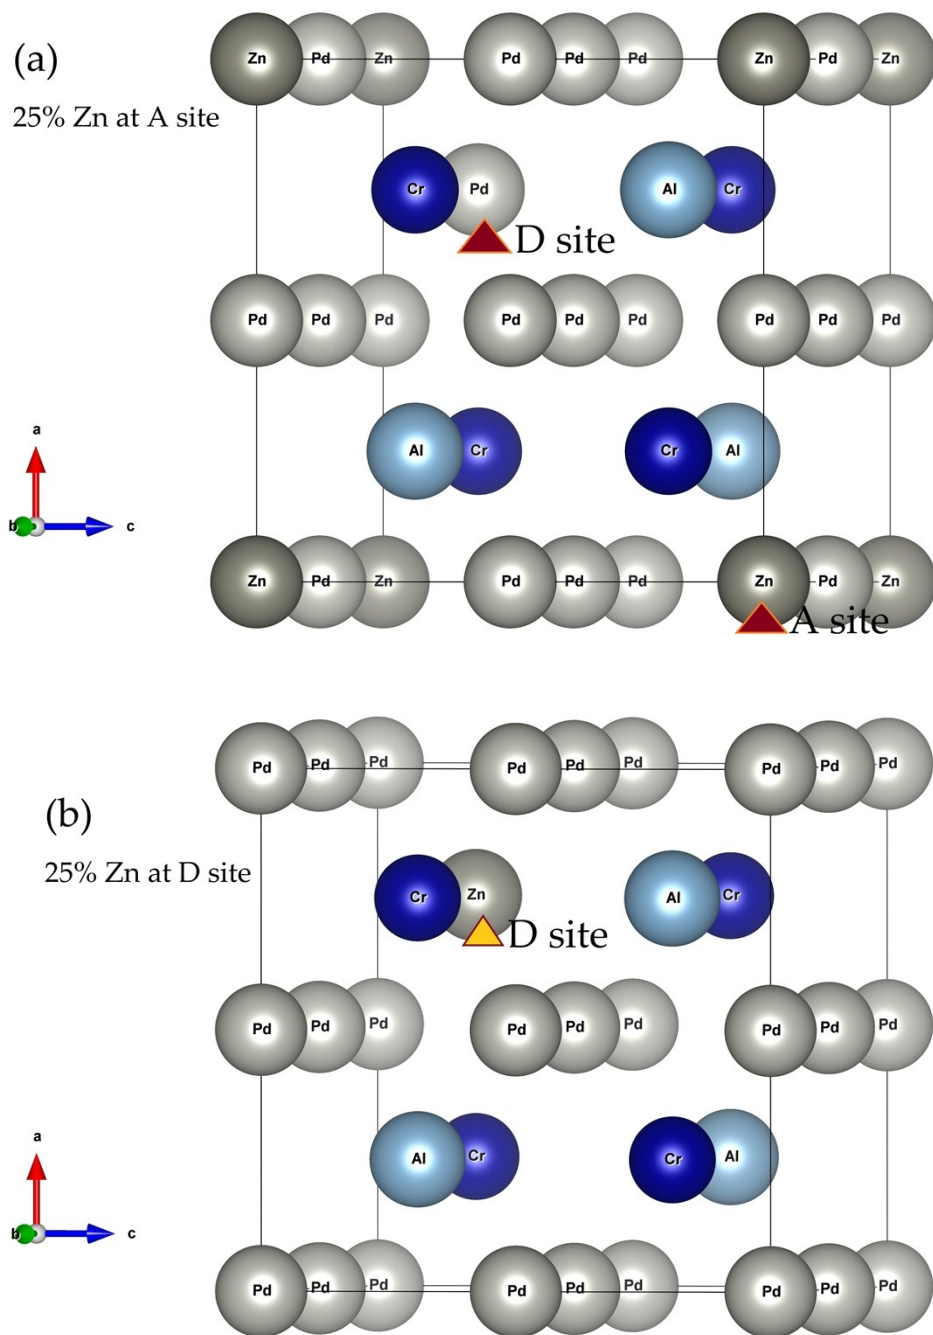

Fig. S2. Crystal structures of  $\text{Pd}_2\text{CrAl}$  doping with 25 % Zn at Wyckoff sites (a) A or (b) D.

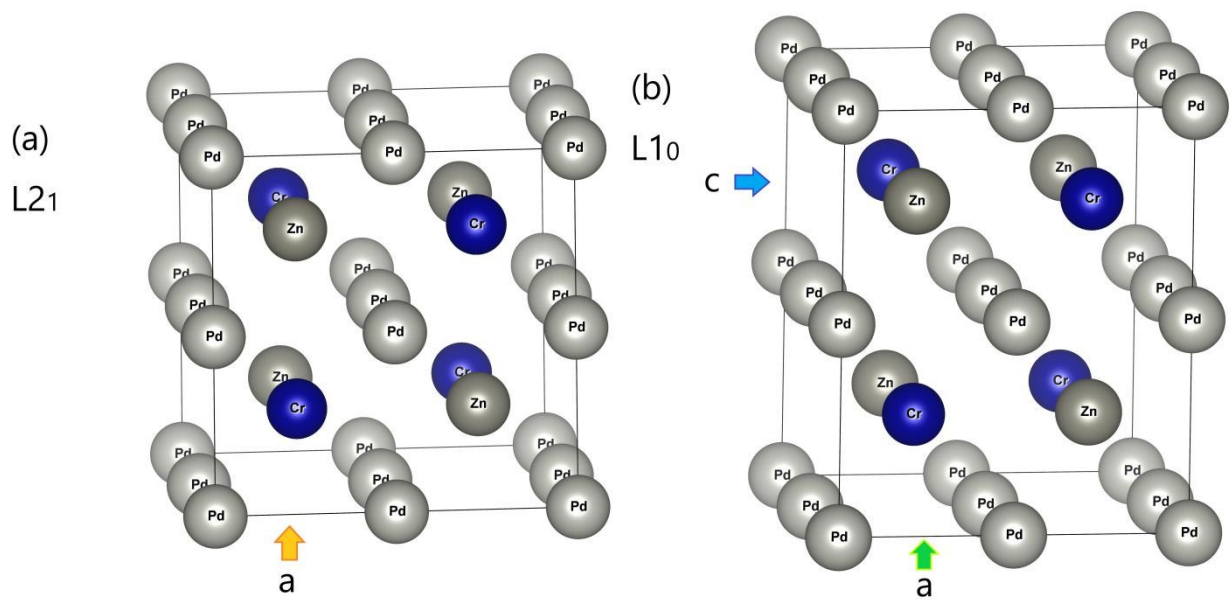

Fig. S3. Crystal structures of cubic L<sub>21</sub>-type (a) and tetragonal L<sub>10</sub>-type (b) Pd<sub>2</sub>CrZn.

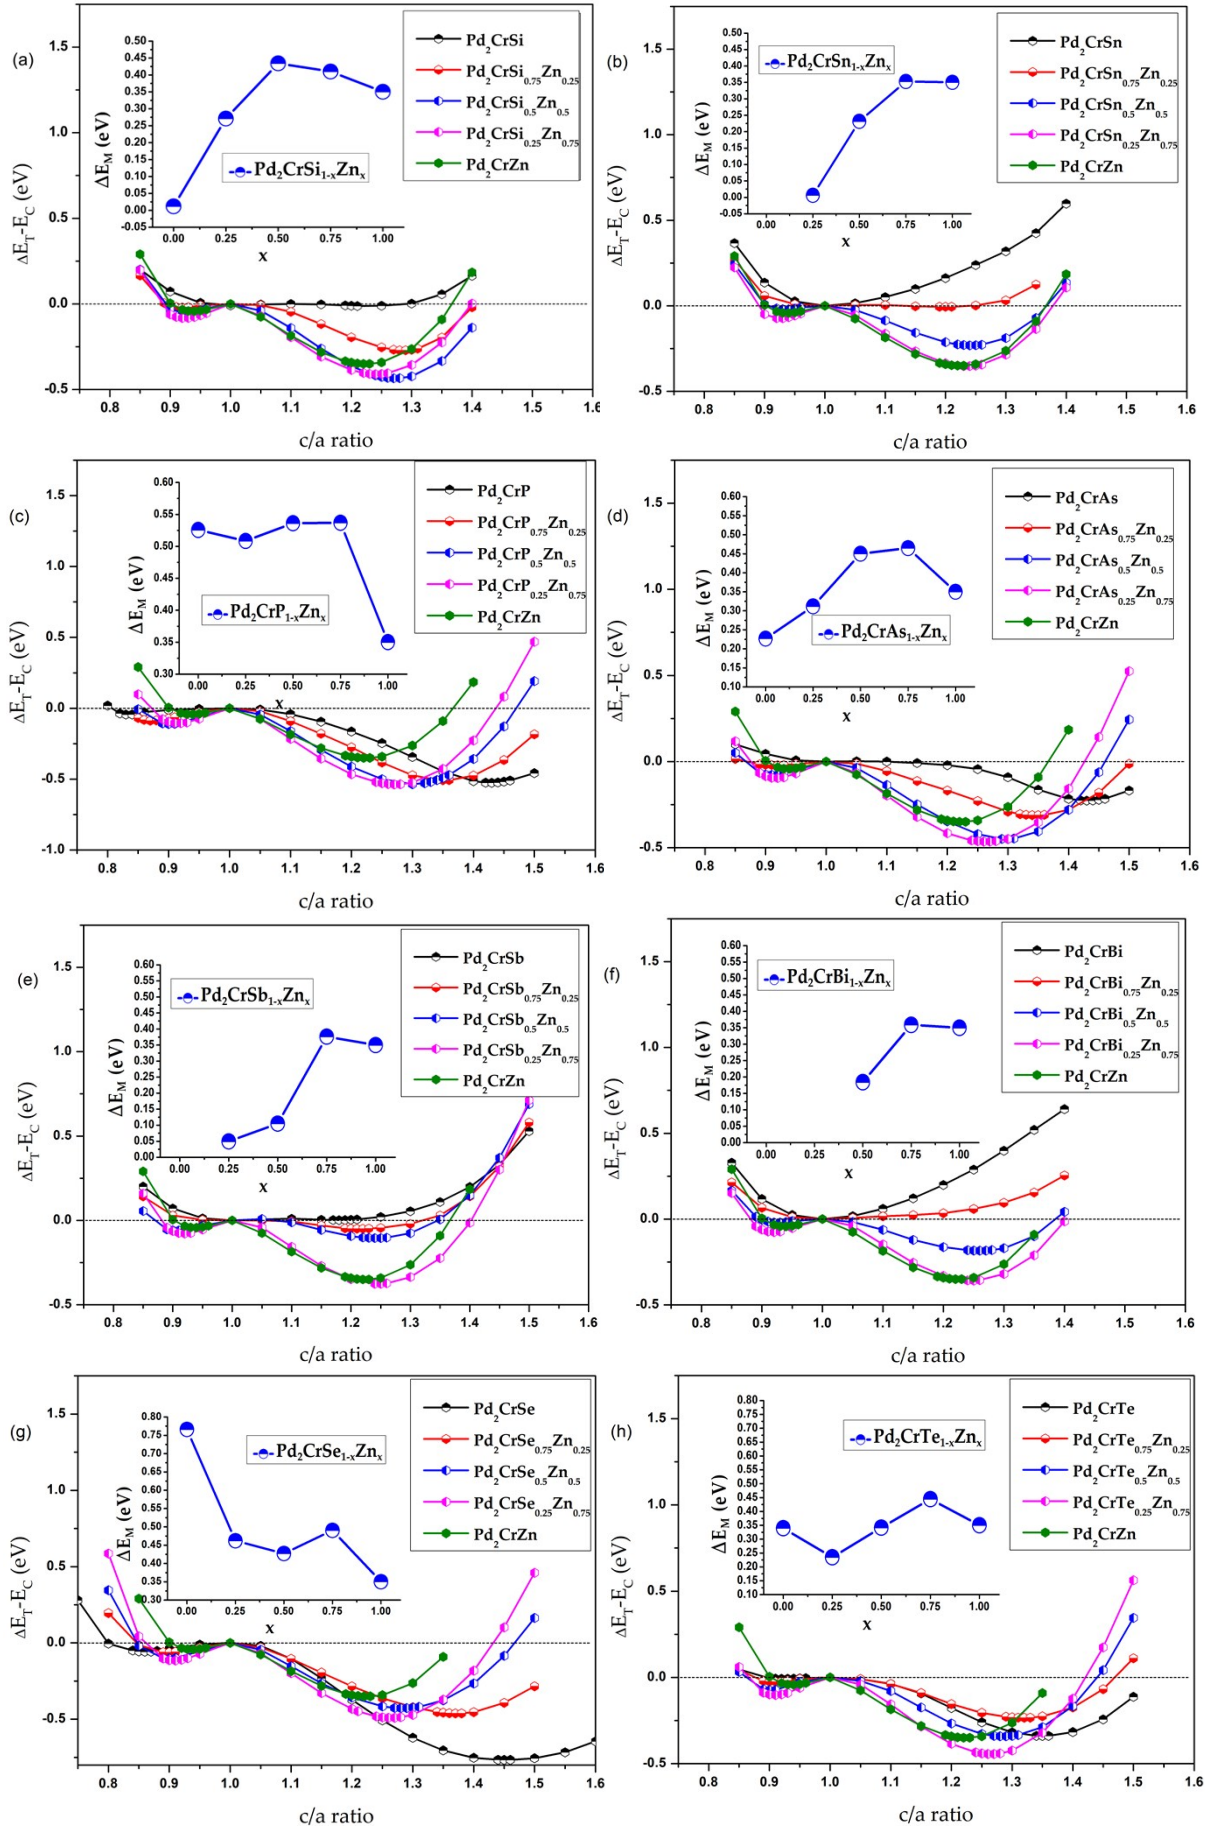

Fig. S4. The total energy differences between tetragonal and cubic states as functions of the c/a ratio of different amount of Zn doping in Pd<sub>2</sub>CrZ (Z = Si, Sn, P, As, Sb, Bi, Se, and Te). The zero point of the total energy was set as the energy of the cubic states (c/a = 1).

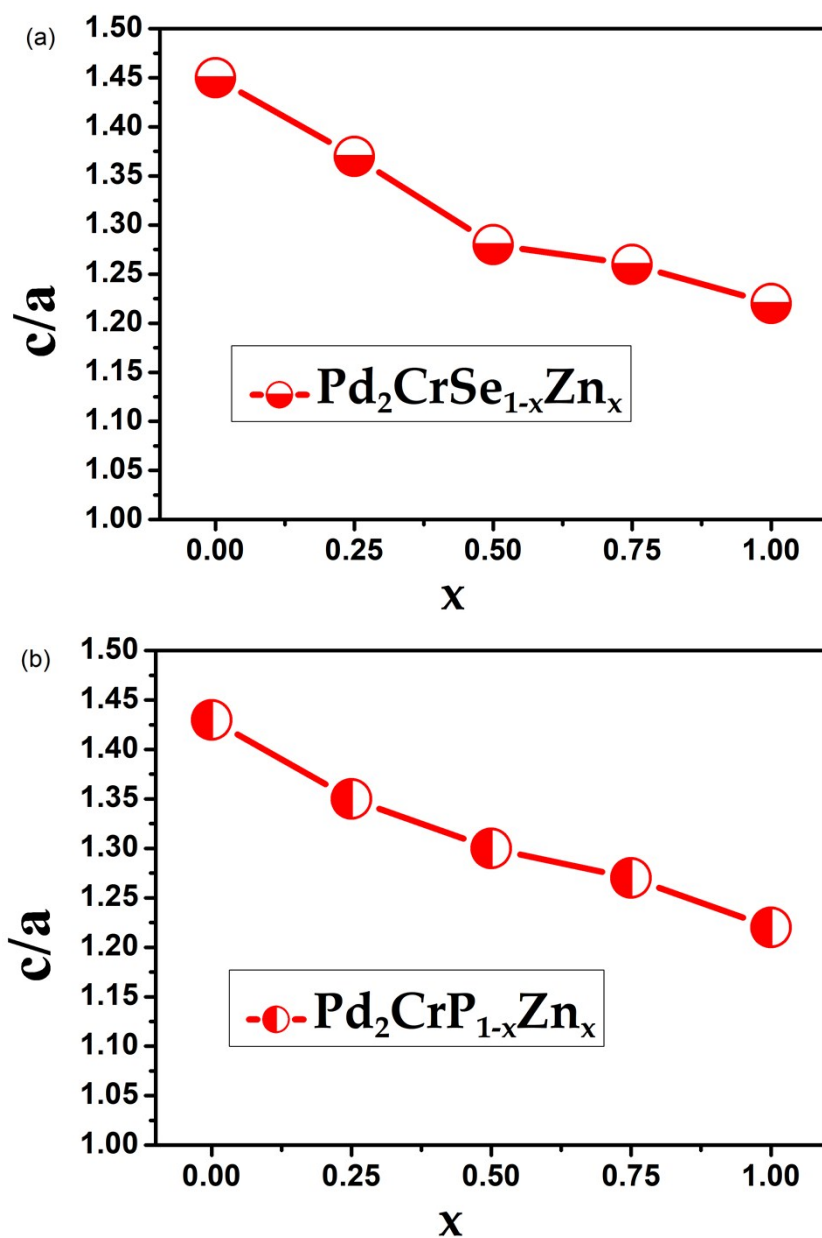

Fig. S5. The  $c/a$  ratios as functions of the amount of Zn doping for  $\text{Pd}_2\text{CrZ}$  ( $Z = \text{Se}, \text{P}$ ).

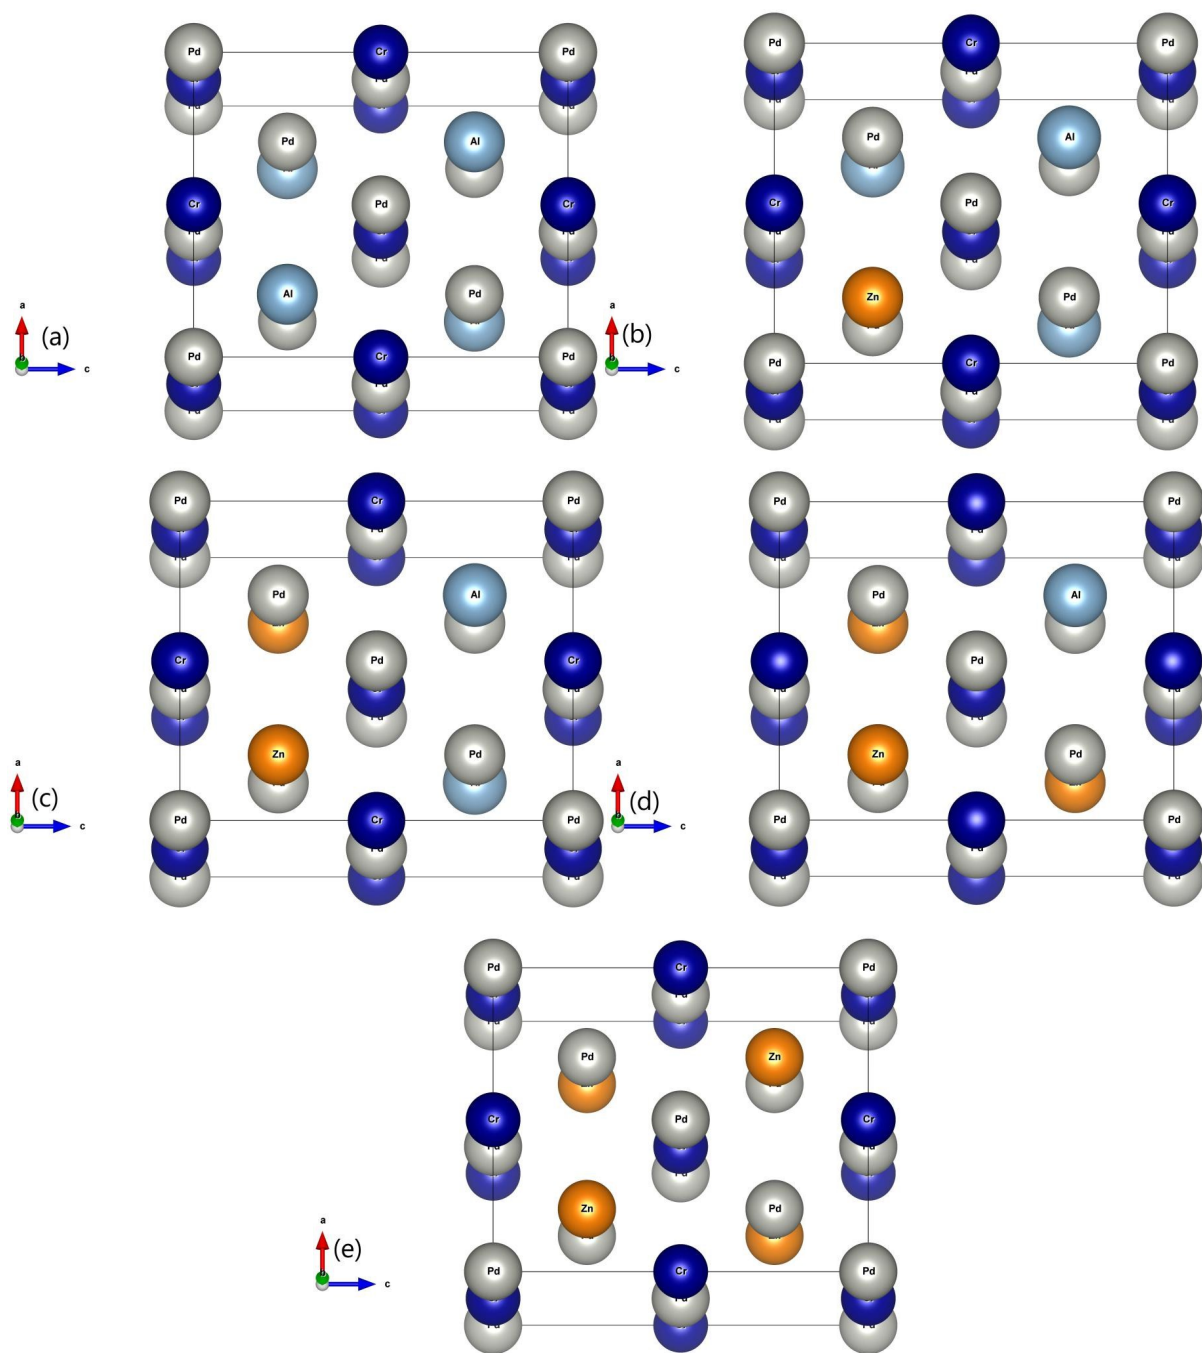

Fig. S6. Crystal structure of L1<sub>0</sub> type Pd<sub>2</sub>CrAl<sub>x</sub>Zn<sub>1-x</sub> (x = 0, 0.25, 0.5, 0.75, 1).
